# Supplementary material for: Variability in excess deaths across countries with different vulnerability during 2020–2023
Source: PubMed Central journal article supplement — Proc Natl Acad Sci U S A. 2023 Nov 29;120(49):e2309557120. doi: 10.1073/pnas.2309557120 (PMC10710037; doi:10.1073/pnas.2309557120), 2023-11-29
Supplement: pnas.2309557120.sapp.pdf [file pnas.2309557120.sapp.pdf]

## Supporting Information for

### Variability in excess deaths across countries with different vulnerability during 2020-2023

John P.A. Ioannidis, Francesco Zonta, Michael Levitt

Departments of Medicine, of Epidemiology and Population Health, of Biomedical Data Science, and of Statistics, and Meta-Research Innovation Center at Stanford (METRICS), Stanford University, Stanford, CA 94305, USA (John P.A. Ioannidis).

Department of Biological Sciences, Xi'An Jiaotong Liverpool University, Suzhou 215123, China (Francesco Zonta)

Department of Structural Biology, Stanford University, Stanford, CA 94305, USA (Michael Levitt).

\* Michael Levitt

**Email:** Michael.levitt@stanford.edu

**This PDF file includes:**

Figure S1  
Tables S1 to S6

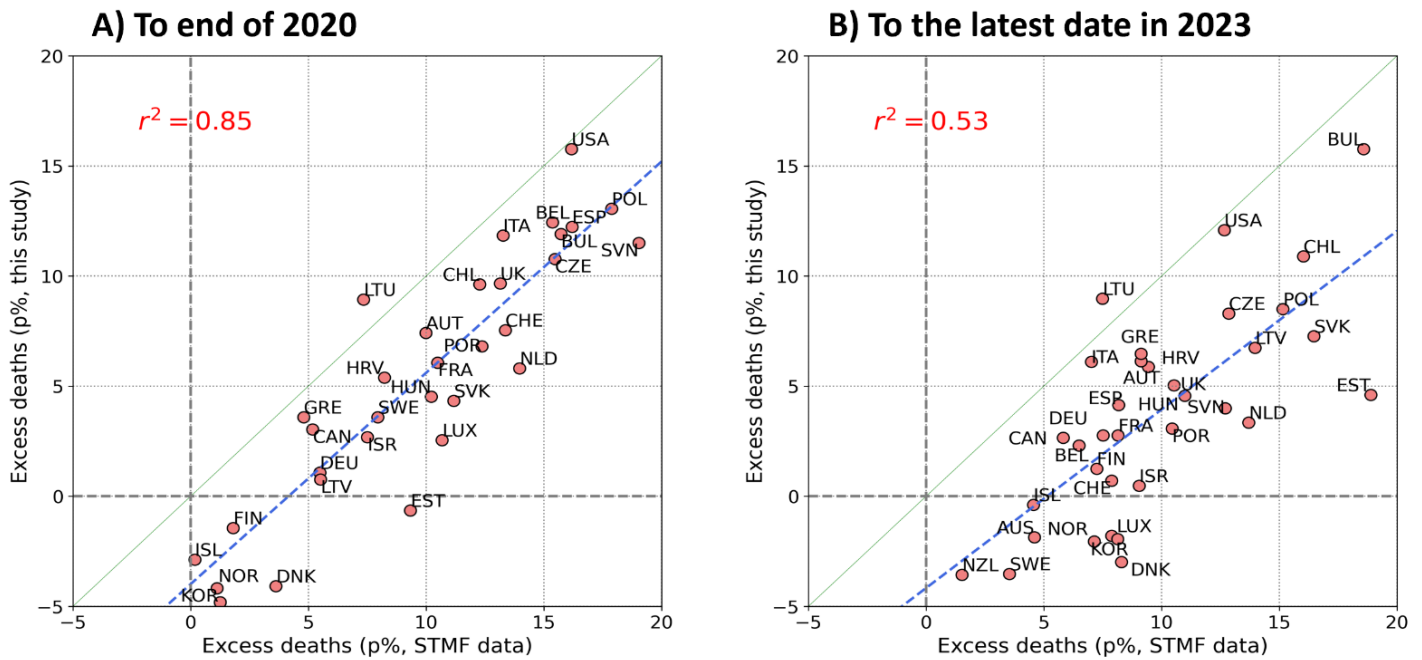

**Fig. S1.** Scatterplot of excess deaths p%. A. until the end of 2020 and B. over the entire 2020-2023 period (to latest available date in 2023) using the average of 2017-2019 as reference versus using the week-specific trend method with a linear trend<sup>7</sup> and considering the 2000-2019 period (or longest span of consecutive years if start year with available data is later than 2000) as reference (estimates from STMF).

Table S1. **Table S1. Mean and standard deviation of excess deaths p% (% of expected deaths) at different time points for more and less vulnerable countries**

| <b>Time point</b>    | <b>Excess deaths in less vulnerable countries, mean p% (standard deviation)</b> | <b>Excess deaths in more vulnerable countries, mean p% (standard deviation)</b> |
|----------------------|---------------------------------------------------------------------------------|---------------------------------------------------------------------------------|
| March 2020 (week 12) | -7.4 (3.7)                                                                      | -7.7 (3.9)                                                                      |
| Mid-2020 (week 26)   | -1.6 (4.7)                                                                      | 0 (8.1)                                                                         |
| End-2020 (week 52)   | 1.2 (5.6)                                                                       | 8.2 (4.5)                                                                       |
| Mid-2021 (week 78)   | -0.7 (4.4)                                                                      | 9.8 (4.3)                                                                       |
| End-2021 (week 104)  | 0.3 (4.2)                                                                       | 11.8 (4.7)                                                                      |
| Mid-2022 (week 130)  | 0.5 (3)                                                                         | 10.2 (4.5)                                                                      |
| End-2022 (week 156)  | 1.2 (3)                                                                         | 9.5 (3.7)                                                                       |
| Mid-2023 (week 182)  | 0.3 (2.8)                                                                       | 7.3 (3.3)                                                                       |
| July 2023 (week 185) | 0.2 (2.7)                                                                       | 7.2 (3.3)                                                                       |

**Table S2. Correlations between excess death estimates p% and vulnerability indicators at different time points**

| <b>Time point</b>    | <b>Pearson (Spearman) correlation with per capita nominal GDP</b> | <b>Pearson (Spearman) correlation with Gini for income inequality</b> | <b>Pearson (Spearman) correlation with proportion living in poverty</b> |
|----------------------|-------------------------------------------------------------------|-----------------------------------------------------------------------|-------------------------------------------------------------------------|
| March 2020 (week 12) | -0.07 (0.17)                                                      | 0.19 (0.18)                                                           | 0.12 (0.08)                                                             |
| Mid-2020 (week 26)   | 0.02 (0.22)                                                       | 0.34 (0.23)                                                           | 0.05 (0.00)                                                             |
| End-2020 (week 52)   | -0.30 (-0.33)                                                     | 0.23 (0.15)                                                           | 0.32 (0.26)                                                             |
| Mid-2021 (week 78)   | -0.55 (-0.65)                                                     | 0.30 (0.18)                                                           | 0.49 (0.49)                                                             |
| End-2021 (week 104)  | -0.59 (-0.69)                                                     | 0.32 (0.2)                                                            | 0.59 (0.57)                                                             |
| Mid-2022 (week 130)  | -0.62 (-0.72)                                                     | 0.41 (0.26)                                                           | 0.67 (0.62)                                                             |
| End-2022 (week 156)  | -0.62 (-0.7)                                                      | 0.41 (0.26)                                                           | 0.66 (0.61)                                                             |
| Mid-2023 (week 182)  | -0.6 (-0.69)                                                      | 0.46 (0.29)                                                           | 0.66 (0.60)                                                             |
| July 2023 (week 185) | -0.6 (-0.69)                                                      | 0.45 (0.29)                                                           | 0.66 (0.61)                                                             |

**Table S3. Estimates of p% from 1/2020 to the end of each calendar year and to the latest available 2023 data according to the week-specific trend analyses provided in the SMTF (ref. 7 and ref. 11)**

| <b>Country</b> | <b>End-2020</b> | <b>End-2021</b> | <b>End-2022</b> | <b>Latest-2023</b> | <b>Reference period start year</b> |
|----------------|-----------------|-----------------|-----------------|--------------------|------------------------------------|
| Australia      | -2.0%           | 0.2%            | 4.4%            | 4.6%               | 2015                               |
| Austria        | 10.0%           | 9.7%            | 10.3%           | 9.4%               | 2000                               |
| Belgium        | 15.4%           | 8.8%            | 7.8%            | 6.5%               | 2000                               |
| Bulgaria       | 15.7%           | 27.7%           | 22.4%           | 18.6%              | 2000                               |
| Canada         | 5.2%            | 4.9%            | 6.6%            | 5.8%               | 2010                               |
| Chile          | 12.3%           | 16.9%           | 17.7%           | 16.0%              | 2016                               |
| Croatia        | 8.2%            | 13.3%           | 11.6%           | 9.1%               | 2001                               |
| Czechia        | 15.5%           | 19.7%           | 15.2%           | 12.8%              | 2005                               |
| Denmark        | 3.6%            | 6.0%            | 8.3%            | 8.3%               | 2007                               |
| Estonia        | 9.3%            | 19.0%           | 20.0%           | 18.9%              | 2000                               |
| Finland        | 1.8%            | 3.8%            | 7.6%            | 7.2%               | 2000                               |
| France         | 10.5%           | 9.4%            | 9.6%            | 8.1%               | 2000                               |
| Germany        | 5.5%            | 5.2%            | 8.1%            | 7.5%               | 2000                               |
| Greece         | 4.8%            | 9.7%            | 10.2%           | 9.1%               | 2015                               |
| Hungary        | 10.2%           | 16.0%           | 13.1%           | 11.0%              | 2000                               |
| Iceland        | 0.2%            | 0.4%            | 4.8%            | 4.5%               | 2000                               |
| Israel         | 7.5%            | 9.3%            | 10.2%           | 9.0%               | 2000                               |
| Italy          | 13.3%           | 10.1%           | 9.0%            | 7.0%               | 2011                               |
| South Korea    | 1.3%            | 2.6%            | 8.5%            | 8.1%               | 2010                               |
| Latvia         | 5.5%            | 16.6%           | 15.7%           | 14.0%              | 2000                               |
| Lithuania      | 7.3%            | 12.5%           | 10.1%           | 7.5%               | 2000                               |
| Luxembourg     | 10.7%           | 9.2%            | 8.3%            | 7.9%               | 2000                               |
| Netherlands    | 14.0%           | 14.4%           | 14.2%           | 13.7%              | 2000                               |
| New Zealand    | -4.9%           | -2.6%           | 1.2%            | 1.5%               | 2010                               |
| Norway         | 1.1%            | 3.3%            | 7.2%            | 7.1%               | 2000                               |
| Poland         | 17.9%           | 22.7%           | 18.3%           | 15.1%              | 2000                               |
| Portugal       | 12.4%           | 12.9%           | 12.9%           | 10.4%              | 2000                               |
| Slovakia       | 11.2%           | 24.0%           | 19.9%           | 16.5%              | 2000                               |
| Slovenia       | 19.0%           | 16.8%           | 14.7%           | 12.7%              | 2000                               |
| Spain          | 16.2%           | 10.8%           | 9.9%            | 8.2%               | 2000                               |
| Sweden         | 7.9%            | 4.5%            | 4.3%            | 3.5%               | 2000                               |
| Switzerland    | 13.4%           | 9.3%            | 9.5%            | 7.9%               | 2000                               |
| UK             | 13.1%           | 11.3%           | 10.2%           | 10.5%              | 2015                               |
| USA            | 16.2%           | 16.7%           | 14.3%           | 12.7%              | 2015                               |

**Table S4. p%, absolute and per million excess deaths in non-elderly age strata (0-14, 15-64)**

| Country     | Excess deaths for 0-14 |          |             | Excess deaths for 15-64 |          |             |
|-------------|------------------------|----------|-------------|-------------------------|----------|-------------|
|             | p (%)                  | absolute | per million | p (%)                   | absolute | per million |
| Australia   | -12.1                  | -562     | -118.4      | -1.53                   | -1442    | -86.6       |
| Austria     | -9.3                   | -118     | -92.5       | 6.6                     | 2,687    | 454.7       |
| Belgium     | -21.8                  | -460     | -237.4      | -1.4                    | -760     | -103.1      |
| Bulgaria    | -16.5                  | -318     | -318.3      | 15.1                    | 11,114   | 2,509.9     |
| Canada      | 14.5                   | 1,072    | 178.1       | 9.3                     | 15,975   | 637.0       |
| Chile       | -18.7                  | -1,318   | -379.6      | 18.8                    | 18,357   | 1,507.1     |
| Croatia     | -5.7                   | -41      | -71.3       | 2.7                     | 780      | 298.9       |
| Czechia     | -17.0                  | -272     | -161.4      | 5.2                     | 3,300    | 491.3       |
| Denmark     | -4.9                   | -48      | -51.4       | -7.0                    | -1,973   | -531.5      |
| Estonia     | -6.5                   | -12      | -57.2       | 5.6                     | 585      | 696.1       |
| Finland     | -7.8                   | -45      | -52.7       | -3.3                    | -898     | -262.7      |
| France      | -4.9                   | -618     | -53.9       | -4.2                    | -13,705  | -340.0      |
| Germany     | -5.8                   | -750     | -65.6       | 3.7                     | 17,371   | 324.5       |
| Greece      | -11.3                  | -170     | -112.9      | 8.9                     | 4,707    | 693.9       |
| Hungary     | -8.8                   | -150     | -105.7      | 0.9                     | 818      | 128.5       |
| Iceland     | NR                     | NR       | NR          | 2.0                     | 26       | 108.0       |
| Israel      | -14.4                  | -417     | -161.2      | -1.5                    | -391     | -71.4       |
| Italy       | -17.2                  | -1,094   | -142.5      | 6.3                     | 14,551   | 384.5       |
| South Korea | -19.2                  | -938     | -147.0      | 1.0                     | 2,276    | 61.8        |
| Latvia      | -24.8                  | -97      | -320.1      | 7.5                     | 1,637    | 1,358.1     |
| Lithuania   | -21.2                  | -108     | -255.8      | 10.2                    | 3,033    | 1,669.9     |
| Luxembourg  | NR                     | 52       | NR          | -5.8                    | -152     | -348.0      |
| Netherlands | 0.2                    | 4        | 1.6         | 1.7                     | 1,247    | 110.4       |
| New Zealand | -3.4                   | -41      | -42.7       | -2.2                    | -507     | -153.1      |
| Norway      | -10.3                  | -69      | -74.8       | -2.8                    | -552     | -157.8      |
| Poland      | -13.2                  | -996     | -169.1      | 3.5                     | 11,430   | 449.8       |
| Portugal    | -8.0                   | -107     | -77.2       | 4.6                     | 2,550    | 386.0       |
| Slovakia    | -4.1                   | -60      | -70.1       | 5.8                     | 2,606    | 709.4       |
| Slovenia    | -8.3                   | -18      | -59.7       | -3.0                    | -341     | -252.9      |
| Spain       | -4.2                   | -221     | -32.4       | 6.0                     | 12,041   | 385.7       |
| Sweden      | -5.8                   | -80      | -43.7       | -7.1                    | -2,308   | -358.4      |
| Switzerland | -3.4                   | -48      | -37.6       | -1.3                    | -372     | -65.2       |
| UK          | -5.9                   | -823     | -69.4       | 12.5                    | 40,564   | 957.8       |
| USA         | -3.3                   | -3,456   | -56.7       | 18.8                    | 458,821  | 2,132.2     |

NR: not reliable due to small numbers (see discussion in Table 2)

**Table S5. p%, absolute and per million excess deaths in elderly age strata (65-74, 75-84, 85+)**

| Country     | Excess deaths for 65-74 |          |             | Excess deaths for 75-84 |          |             | Excess deaths for 85 Plus |          |             |
|-------------|-------------------------|----------|-------------|-------------------------|----------|-------------|---------------------------|----------|-------------|
|             | p (%)                   | absolute | per million | p (%)                   | absolute | per million | p (%)                     | absolute | per million |
| Australia   | -2.3                    | -2,181   | -921.8      | -3.48                   | -5564    | -4302.6     | -0.5                      | -1198    | -2308.7     |
| Austria     | 2.7                     | 1,285    | 1,498.7     | 10.41                   | 8933     | 14304.2     | 3.88                      | 4817     | 21263.1     |
| Belgium     | 4.0                     | 2,560    | 2,163.5     | 1.23                    | 1305     | 1864.4      | 3.88                      | 6579     | 19657.8     |
| Bulgaria    | 24.2                    | 20,537   | 23,255.3    | 13.59                   | 16084    | 33660.4     | 12.11                     | 11650    | 79215.5     |
| Canada      | 1.4                     | 2,451    | 620.7       | 0.33                    | 838      | 411.9       | 1.55                      | 5562     | 6496.1      |
| Chile       | 10.0                    | 8,243    | 6,315.0     | 9.79                    | 10790    | 15698.6     | 7.88                      | 9732     | 45783.1     |
| Croatia     | 11.5                    | 4,232    | 8,808.3     | 5.74                    | 3420     | 12004.6     | 5.1                       | 3090     | 32613.9     |
| Czechia     | 9.8                     | 9,043    | 7,027.6     | 8.16                    | 10260    | 15752.2     | 9.37                      | 10957    | 53482.7     |
| Denmark     | -0.9                    | -324     | -505.9      | -3.92                   | -2687    | -6718.1     | -1.65                     | -1212    | -9591.6     |
| Estonia     | 4.4                     | 498      | 3,489.0     | 4.62                    | 738      | 8178.1      | 4.28                      | 847      | 23913.5     |
| Finland     | 4.2                     | 1,528    | 2,147.0     | -0.89                   | -527     | -1392.7     | 3.1                       | 2490     | 16249.7     |
| France      | 4.9                     | 16,667   | 2,278.1     | -1.72                   | -8785    | -2180.9     | 6.61                      | 67633    | 30138.9     |
| Germany     | 4.4                     | 23,916   | 2,745.2     | 7.04                    | 73654    | 10468.3     | -1.14                     | -16647   | -6793.7     |
| Greece      | 9.7                     | 5,957    | 5,041.8     | 2.8                     | 3549     | 4254.51     | 7.3                       | 14575    | 38147.9     |
| Hungary     | 10.7                    | 11,881   | 10,361.3    | 4.67                    | 6460     | 10468.0     | 1.99                      | 2403     | 11987.5     |
| Iceland     | 2.2                     | 28       | 929.4       | -6.54                   | -158     | -10033      | 1.51                      | 50       | 7687.6      |
| Israel      | 3.8                     | 1,144    | 1,729.1     | -1.92                   | -903     | -2879.2     | 2.07                      | 1398     | 10507.5     |
| Italy       | 7.0                     | 21,251   | 3,099.1     | 6.34                    | 41637    | 8576.3      | 5.83                      | 64102    | 29131.4     |
| South Korea | -5.7                    | -10,814  | -2,332.4    | -2.54                   | -9201    | -3390.3     | -1.03                     | -3906    | -4975.4     |
| Latvia      | 7.8                     | 1,528    | 7,542.4     | 8.13                    | 2371     | 16624.1     | 4.56                      | 1353     | 28503.2     |
| Lithuania   | 10.9                    | 2,734    | 9,667.3     | 9.97                    | 3776     | 18980.8     | 6.55                      | 2878     | 38447.1     |
| Luxembourg  | -7.7                    | -209     | -4,152.1    | -3.93                   | -165     | -5692.4     | 3.16                      | 191      | 15560.1     |
| Netherlands | 3.7                     | 3,674    | 1,882.3     | 3.9                     | 6683     | 6154.1      | 3.33                      | 7687     | 19776.5     |
| New Zealand | -4.1                    | -904     | -1,972.6    | -5.19                   | -1901    | -7811.0     | -2.69                     | -1265    | -14298      |
| Norway      | -2.4                    | -614     | -1,142.3    | -5.21                   | -2371    | -7920.3     | 0.71                      | 445      | 3793.2      |
| Poland      | 13.9                    | 49,720   | 11,486.6    | 8.27                    | 30686    | 16079.7     | 8.41                      | 37775    | 45940.1     |
| Portugal    | 3.6                     | 2,157    | 1,827.9     | -0.78                   | -958     | -1214.9     | 5.17                      | 9311     | 26820.1     |
| Slovakia    | 12.8                    | 6,131    | 10,712.7    | 8.22                    | 4702     | 17840.5     | 2.55                      | 1287     | 15261.6     |
| Slovenia    | 4.7                     | 648      | 2,738.0     | 4.74                    | 1017     | 7377.4      | 5.97                      | 1749     | 31830.8     |
| Spain       | 6.7                     | 13,998   | 2,988.8     | -0.26                   | -1052    | -343.4      | 5.41                      | 40006    | 25406       |
| Sweden      | -3.4                    | -1,673   | -1,529.7    | -3.84                   | -3969    | -5508.6     | -2.52                     | -3600    | -13674      |
| Switzerland | -1.2                    | -410     | -492.5      | -0.58                   | -397     | -717.1      | 2.5                       | 3037     | 13120.5     |
| UK          | 7.0                     | 25,601   | 3,812.1     | 2.56                    | 17318    | 4187.7      | 3.57                      | 31758    | 19011.8     |
| USA         | 12.9                    | 263,333  | 8,089.1     | 10.23                   | 258053   | 16171       | 8.16                      | 243543   | 40198.7     |

**Table S6. Standardized excess death rates for 2020-2023 using the average of 2017-2019 as reference and using the 2013 European Standard Population**

| <b>Country</b> | <b>Standardized excess death rate (per 100,000 population)</b> |
|----------------|----------------------------------------------------------------|
| Australia      | -41                                                            |
| Austria        | 174                                                            |
| Belgium        | 51                                                             |
| Bulgaria       | 574                                                            |
| Canada         | 63                                                             |
| Chile          | 308                                                            |
| Croatia        | 178                                                            |
| Czechia        | 265                                                            |
| Denmark        | -103                                                           |
| Estonia        | 157                                                            |
| Finland        | 14                                                             |
| France         | 38                                                             |
| Germany        | 71                                                             |
| Greece         | 166                                                            |
| Hungary        | 105                                                            |
| Iceland        | -39                                                            |
| Israel         | 0                                                              |
| Italy          | 151                                                            |
| South Korea    | -33                                                            |
| Latvia         | 262                                                            |
| Lithuania      | 323                                                            |
| Luxembourg     | -21                                                            |
| Netherlands    | 97                                                             |
| New Zealand    | -97                                                            |
| Norway         | -53                                                            |
| Poland         | 246                                                            |
| Portugal       | 83                                                             |
| Slovakia       | 199                                                            |
| Slovenia       | 110                                                            |
| Spain          | 86                                                             |
| Sweden         | -94                                                            |
| Switzerland    | 23                                                             |
| UK             | 135                                                            |
| USA            | 342                                                            |

The 2013 European Standard Population has 16%, 64.5%, 10.5%, 6.5%, and 2.5% of the population in the 0-14, 15-64, 65-74, t5-84, and 85 and above years strata, respectively.
